# Supplementary material for: Insertion sequence-caused large-scale rearrangements in the genome of Escherichia coli
Source: PubMed Central journal article supplement — Nucleic Acids Res. 2016 Jul 18;44(15):7109–19. doi: 10.1093/nar/gkw647 (PMC5009759; doi:10.1093/nar/gkw647), 2016-07-18
Supplement: supp_gkw647_nar-01235-h-2016-File010.pdf [file supp_gkw647_nar-01235-h-2016-File010.pdf]

## SUPPLEMENTARY MATERIAL

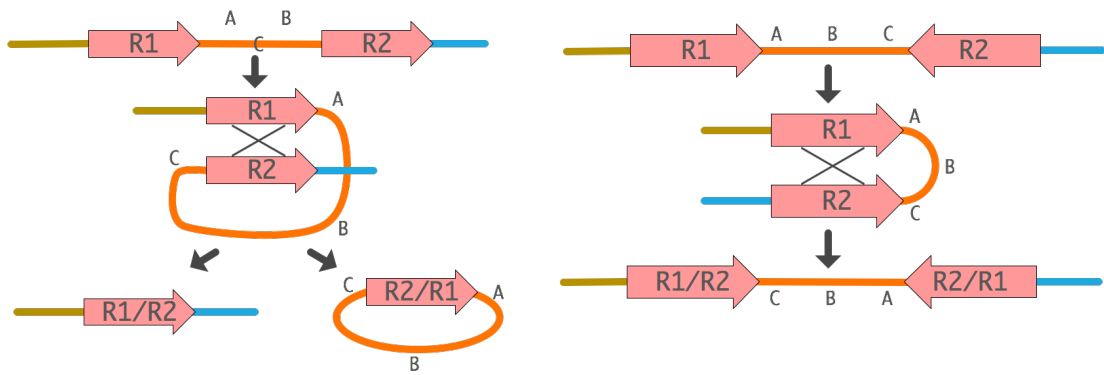

**S1 Figure. Homologous recombination may occur between two direct copies (left) or two inverted copies (right) of IS elements.** Recombination between inverted copies inverts the intervening segment; as a result, the set of paired-end shotgun reads obtained from the genome with or without the recombination remains the same as long as the length of the intervening segment is greater than the insert size of the paired-end reads. Therefore, our analysis here focuses on the recombination between direct repeats.

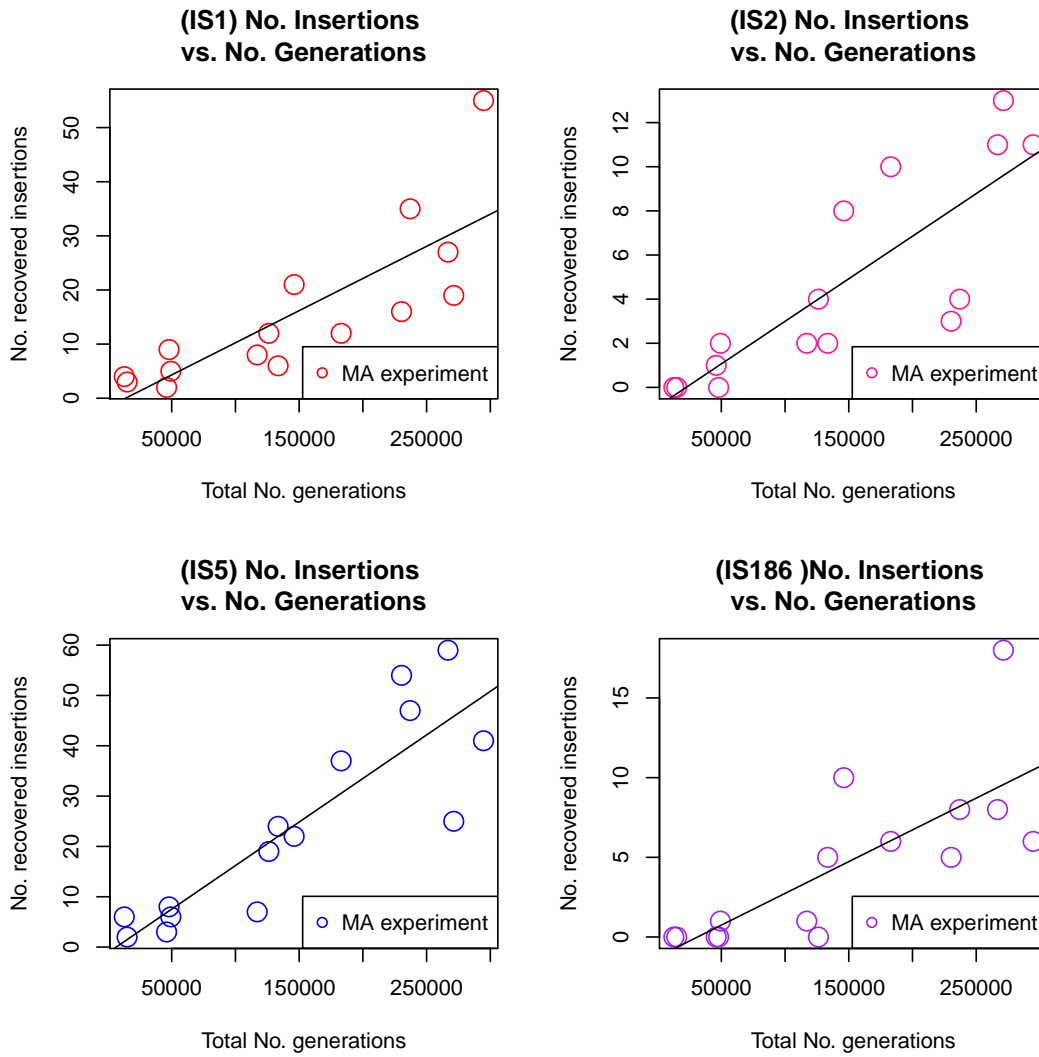

**S2 Figure.** The IS insertion rates in all MA experiments for each of the four most active IS families. IS1 ( $1.2 \times 10^{-4}$ ,  $R^2 = 0.63$ ,  $p = 2.73 \times 10^{-4}$ ), IS2 ( $3.9 \times 10^{-5}$ ,  $R^2 = 0.66$ ,  $p = 1.45 \times 10^{-4}$ ), IS5 ( $1.7 \times 10^{-4}$ ,  $R^2 = 0.75$ ,  $p = 1.96 \times 10^{-5}$ ) and IS186 ( $4.0 \times 10^{-5}$ ,  $R^2 = 0.55$ ,  $p = 9.60 \times 10^{-4}$ )

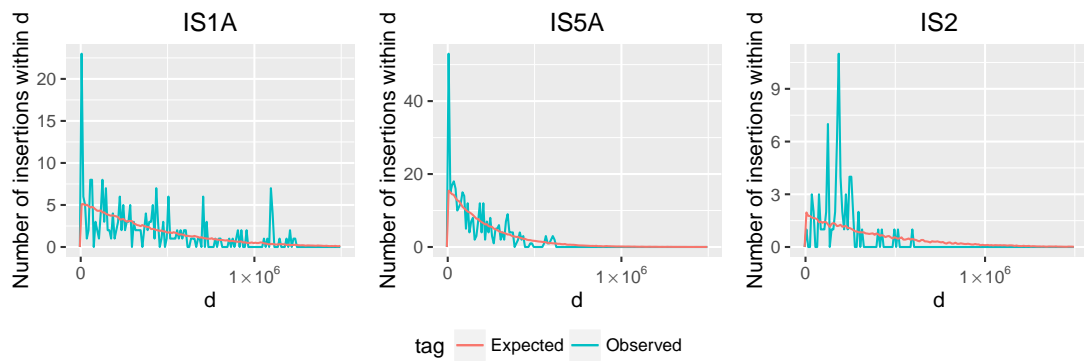

**S3 Figure. Distribution of IS insertions respect to a distance threshold  $d$ .**

Insertions recovered data are shown in blue (observed) and average counts using the 1000-permutation test are shown in red (expected). A bin size of 10,000 bp were used to plot the distributions. IS1A and IS5A exhibit bias for nearby insertions and IS2 shows bias for distant insertions.

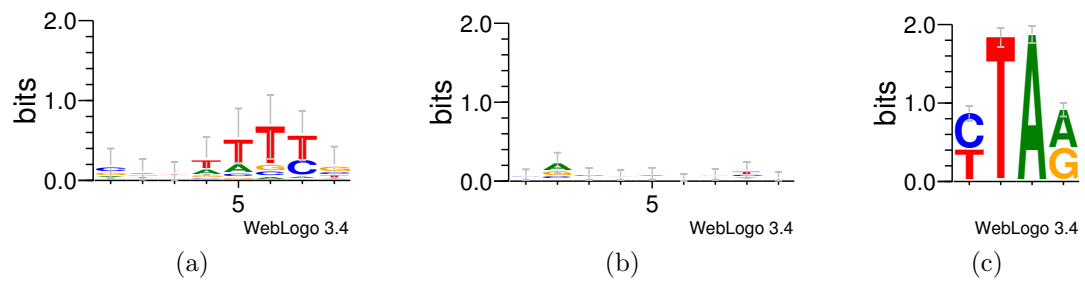

**S4 Figure.** Sequence logos of the reconstructed TSDs of *IS1* with the 8 (a) and 9 (b) bps of TSDs, and *IS5* (c).

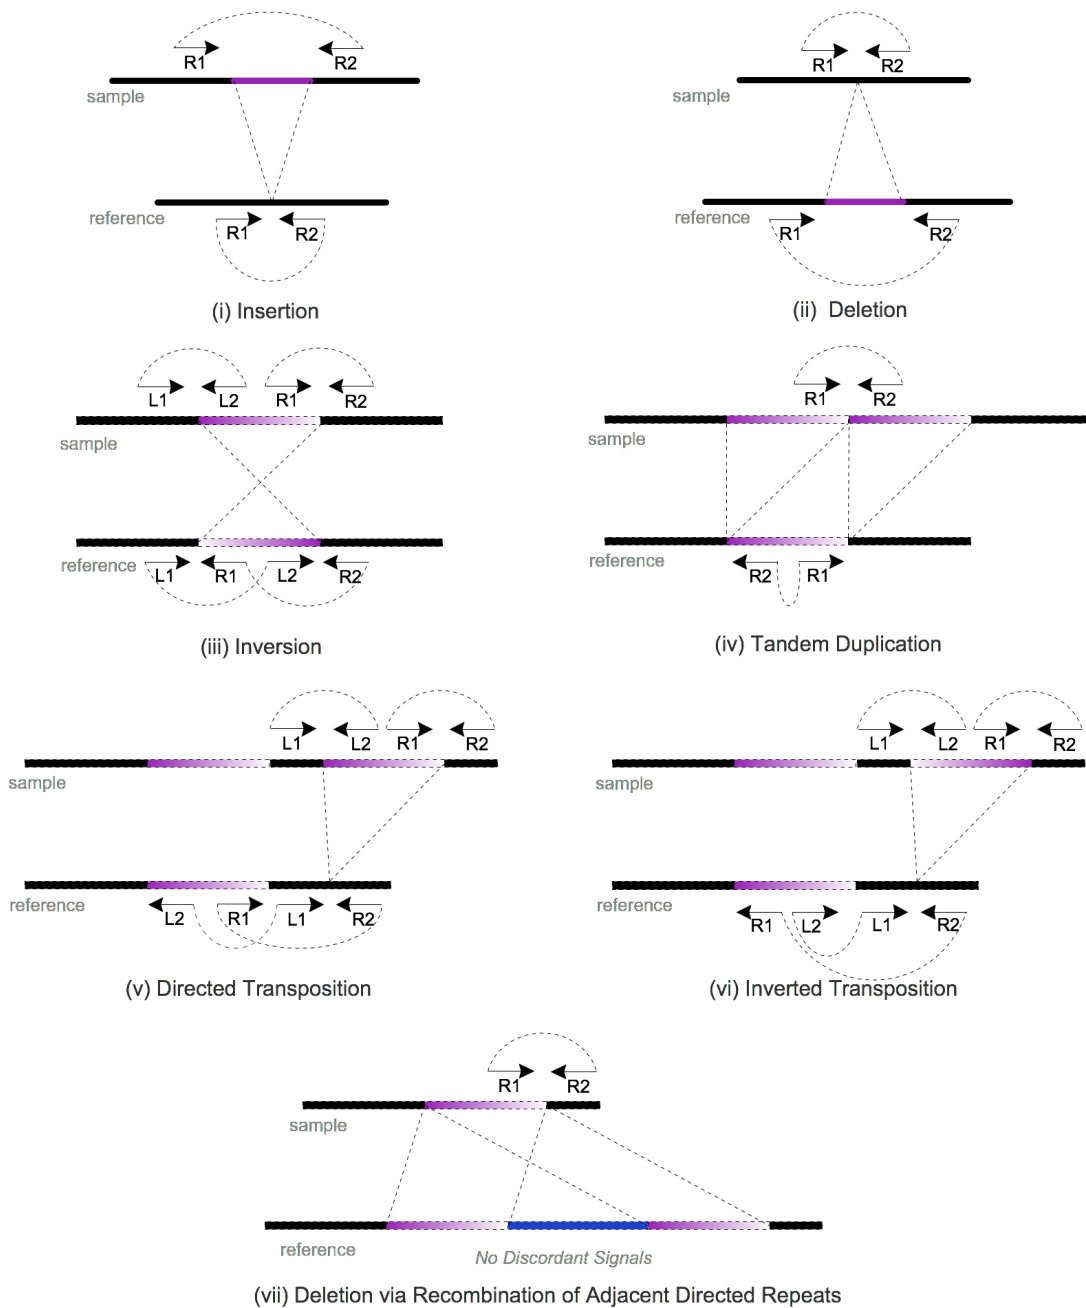

**S5 Figure. Paired-end discordant signals used to identify structural rearrangement events.** (i) and (ii) show simple cases requiring only a single breakpoint cluster and (iii)-(vi) shows complex cases requiring two breakpoint clusters to be correctly identified. (vii) shows that no discordant signal is generated for recombination of two existing direct repeats. GRASPER also uses coverage depletion information along with the discordant signals to confirm all deletion events (including the ones induced by recombination).

**S1 Table.** Number of IS elements of different families in the *E. coli* genome

| IS Family | No. of copies in<br>K-12 MG1655 | No. of copies in<br>PFM2 |
|-----------|---------------------------------|--------------------------|
| IS1A*     | 6                               | 5                        |
| IS1B*     | 1                               | 1                        |
| IS2       | 6                               | 6                        |
| IS3       | 5                               | 5                        |
| IS4       | 1                               | 1                        |
| IS5A*     | 10                              | 10                       |
| IS5B*     | 1                               | 1                        |
| IS30      | 3                               | 3                        |
| IS150     | 1                               | 1                        |
| IS186     | 3                               | 4                        |
| IS609     | 1                               | 1                        |
| ISX       | 1                               | 1                        |
| ISZ       | 1                               | 1                        |
| IS600     | 1                               | 1                        |
| Total     | 41                              | 41                       |

\* IS1 and IS5 families have been further divided into their subfamilies based on sequence divergence of greater than 5%. Note that subfamily classification is automatically done by the A-Bruijn graph constructed by GRASPER.

**S2 Table.** IS element insertions found in *E. coli* MA data

| Strain | Description            | No. of |                         | IS1A | IS1B | IS2 | IS3 | IS4 | IS5A | IS5B | IS150 | IS186 | Total | Rate*<br>( $\times 10^{-4}$ ) |
|--------|------------------------|--------|-------------------------|------|------|-----|-----|-----|------|------|-------|-------|-------|-------------------------------|
|        |                        | Lines  | Generations<br>per line |      |      |     |     |     |      |      |       |       |       |                               |
| PFM2   | WT                     | 38     | 3080                    | 8    | 0    | 2   | 2   | 1   | 7    | 0    | 0     | 1     | 21    | 1.79                          |
| PFM2   | WT-6k                  | 21     | 6356                    | 6    | 0    | 2   | 0   | 0   | 24   | 1    | 1     | 5     | 39    | 2.92                          |
| PFM2   | WT on min              | 44     | 6166                    | 19   | 0    | 13  | 7   | 0   | 25   | 0    | 1     | 18    | 83    | 3.10                          |
| PFM5   | <i>mutL</i>            | 34     | 375                     | 4    | 0    | 0   | 0   | 0   | 6    | 0    | 0     | 0     | 10    | 7.84                          |
| PFM101 | <i>umuDC dinB</i>      | 39     | 6078                    | 35   | 0    | 4   | 0   | 1   | 47   | 0    | 0     | 8     | 95    | 4.03                          |
| PFM133 | <i>umuDC dinB polB</i> | 43     | 6204                    | 27   | 0    | 11  | 0   | 2   | 59   | 1    | 0     | 8     | 108   | 4.07                          |
| PFM35  | <i>wvrA</i>            | 23     | 6350                    | 20   | 0    | 8   | 0   | 2   | 23   | 0    | 0     | 10    | 63    | 4.37                          |
| PFM40  | <i>alkA tagA</i>       | 37     | 6225                    | 16   | 2    | 3   | 1   | 0   | 54   | 0    | 0     | 5     | 81    | 3.56                          |
| PFM88  | <i>ada ogt</i>         | 47     | 6269                    | 55   | 0    | 11  | 0   | 0   | 41   | 0    | 0     | 6     | 113   | 3.88                          |
| PFM180 | <i>xthA nfo</i>        | 40     | 3155                    | 12   | 1    | 4   | 0   | 1   | 19   | 0    | 0     | 0     | 37    | 2.95                          |
| PFM61  | <i>mutT</i>            | 25     | 599                     | 3    | 0    | 0   | 0   | 1   | 2    | 0    | 0     | 0     | 6     | 4.62                          |
| PFM6   | <i>mutY</i>            | 25     | 1972                    | 5    | 0    | 2   | 0   | 0   | 6    | 0    | 0     | 1     | 14    | 2.96                          |
| PFM22  | <i>nth nei</i>         | 50     | 920                     | 2    | 0    | 1   | 0   | 0   | 3    | 0    | 0     | 0     | 6     | 1.43                          |
| PFM91  | <i>nfi</i>             | 29     | 6308                    | 12   | 0    | 10  | 0   | 0   | 37   | 0    | 0     | 6     | 65    | 3.60                          |
| PFM94  | <i>mutY mutM</i>       | 25     | 1916                    | 9    | 0    | 0   | 0   | 0   | 8    | 0    | 0     | 0     | 17    | 3.70                          |

\* per genome per generation

**S3 Table.** IS element recombinations found in *E. coli* MA data

| Strain | Description            | No. of<br>Lines | Generations<br>per line | IS1A | IS1B | IS2 | IS3 | IS4 | IS5A | IS5B | IS30 | IS150 | IS186 | Total | Rate*<br>( $\times 10^{-5}$ ) |
|--------|------------------------|-----------------|-------------------------|------|------|-----|-----|-----|------|------|------|-------|-------|-------|-------------------------------|
| PFM2   | WT                     | 38              | 3080                    | 0    | 0    | 0   | 0   | 0   | 1    | 0    | 0    | 0     | 0     | 1     | 0.854                         |
| PFM2   | WT-6k                  | 21              | 6356                    | 0    | 0    | 0   | 0   | 0   | 2    | 0    | 0    | 0     | 0     | 2     | 1.59                          |
| PFM2   | WT on min              | 44              | 6166                    | 2    | 0    | 0   | 0   | 0   | 6    | 0    | 0    | 0     | 0     | 8     | 2.99                          |
| PFM5   | <i>mutL</i>            | 34              | 375                     | 0    | 0    | 0   | 0   | 0   | 1    | 0    | 0    | 0     | 0     | 1     | 7.84                          |
| PFM101 | <i>umuDC dinB</i>      | 39              | 6078                    | 6    | 0    | 0   | 0   | 0   | 6    | 0    | 0    | 0     | 0     | 12    | 5.09                          |
| PFM133 | <i>umuDC dinB polB</i> | 43              | 6204                    | 6    | 0    | 0   | 0   | 0   | 6    | 0    | 0    | 0     | 0     | 12    | 4.52                          |
| PFM35  | <i>wvrA</i>            | 23              | 6350                    | 1    | 0    | 1   | 0   | 0   | 5    | 0    | 0    | 0     | 0     | 7     | 4.85                          |
| PFM40  | <i>alkA tagA</i>       | 37              | 6225                    | 6    | 1    | 0   | 0   | 0   | 9    | 0    | 0    | 0     | 0     | 16    | 7.04                          |
| PFM88  | <i>ada ogt</i>         | 47              | 6269                    | 11   | 0    | 0   | 0   | 0   | 5    | 0    | 0    | 0     | 0     | 16    | 5.50                          |
| PFM180 | <i>xthA nfo</i>        | 40              | 3155                    | 5    | 0    | 1   | 0   | 0   | 6    | 0    | 0    | 0     | 0     | 12    | 9.58                          |
| PFM61  | <i>mutT</i>            | 25              | 599                     | 0    | 0    | 0   | 0   | 0   | 0    | 0    | 0    | 0     | 0     | 0     | -                             |
| PFM6   | <i>mutY</i>            | 25              | 1972                    | 2    | 0    | 0   | 0   | 0   | 0    | 0    | 0    | 0     | 0     | 2     | 4.23                          |
| PFM22  | <i>nth nei</i>         | 50              | 920                     | 0    | 0    | 0   | 0   | 0   | 0    | 0    | 0    | 0     | 0     | 0     | -                             |
| PFM91  | <i>nfi</i>             | 29              | 6308                    | 2    | 0    | 0   | 0   | 0   | 3    | 0    | 0    | 0     | 0     | 5     | 2.77                          |
| PFM94  | <i>mutY mutM</i>       | 25              | 1916                    | 2    | 0    | 0   | 0   | 0   | 2    | 0    | 0    | 0     | 0     | 4     | 8.71                          |

\* per genome per generation



**S4 Table.** IS186 insertion TSDs with flanking bases

| Number of insertions | TSD Length | Insertion direction | Position | TSDs with flanking bases |
|----------------------|------------|---------------------|----------|--------------------------|
| 1                    | 4          | +                   | 2151681  | GGGG(TTTC)CCCC           |
| 1                    | 5          | -                   | 2599802  | GGGG(AGGAT)CCCC          |
| 4                    | 6          | +/-                 | 838449   | GGGG(CCTGCG)CCCC         |
| 2                    | 6          | -                   | 944131   | GGGG(TTTCGG)CCCC         |
| 1                    | 6          | +                   | 1201165  | GGGG(CTTGCG)CCCC         |
| 8                    | 6          | +/-                 | 2373845  | GGGG(AGATCT)CCCC         |
| 5                    | 6          | +/-                 | 2953112  | GGGG(TTTCCC)CCCC         |
| 1                    | 6          | -                   | 4231411  | GGGG(ATTGAG)CCCC         |
| 16                   | 6          | +/-                 | 4541627  | GGGG(CCGCAA)CCCC         |
| 4                    | 7          | +/-                 | 272209   | GGGG(CCCATAC)CCCC        |
| 2                    | 7          | +                   | 458010   | GGGG(GAAACAT)CCCC        |
| 1                    | 7          | +                   | 1301334  | GGGG(TTGTTAT)CCCC        |
| 1                    | 7          | +                   | 1349217  | GGGG(CGCTTTT)CCCC        |
| 1                    | 7          | +                   | 1391476  | GGGG(AGATTGT)CCCC        |
| 1                    | 7          | -                   | 1716529  | GGGG(AAAATAG)CCCC        |
| 3                    | 7          | -                   | 2373845  | GGGG(AGATCTC)CCCC        |
| 1                    | 6*         | +                   | 357269   | GTGG(ATGTAG)CCCC         |
| 1                    | 6*         | +                   | 2306769  | GTGG(ATGAAA)CCCC         |
| 2                    | 6*         | -                   | 2599802  | AGGG(GATCCT)CCCC         |
| 1                    | 7*         | -                   | 730878   | GGGG(CTGGTCA)CCCA        |
| 2                    | 7*         | +/-                 | 3075731  | CTGG(AGCCCAT)CCCC        |

\* indicates sites differing by 1 or 2-bases in GGGG/CCCC flanking sequences.

**S5 Table. Primers used to confirm IS insertions**

| Name     | IS | Forward Primer (5'→3')   | Reverse Primer (5'→3')   | Forward Primer (5',3')-positions | Reverse Primer (5',3')-positions |
|----------|----|--------------------------|--------------------------|----------------------------------|----------------------------------|
| M35-108  | 5  | GTAGCTGCCCCAGGATGTAC     | TTGGGATATTAGCGGCGGTC     | 153759,153778                    | 154344,154325                    |
| wt1      | 5  | GCCCCATTTTTCTCGGGGCA     | TGGTAGTGACCCCGACCCCG     | 294084,294103                    | 294483,294464                    |
| mutL25   | 5  | TTTCCCGCGCCGAATCTGCC     | ACCATTCTGTCGCAAACAGTCCAC | 317003,317022                    | 317412,317390                    |
| mutL38   | 5  | TGCATCCACCGCCAGTTGGG     | GCACAAACCGTGTTCCGCC      | 318491,318510                    | 318841,318822                    |
| wt99     | 5  | CGGCGCGTACGTGGAGCTAA     | ACGCGTCCGGGAACATCACG     | 330381,330400                    | 330718,330699                    |
| M133-061 | 2  | TGTGGAAAAATGGCTTCGCG     | GCTTGAGTGCATGCGTAAG      | 343948,343967                    | 344521,344502                    |
| wt16     | 1  | GCGGGACGCACAAAATCGTCC    | CCTGGAGCGAAAACACCGGCA    | 431505,431525                    | 431874,431854                    |
| M88-44   | 2  | CGTGCAAGAGGGAAAGGGAT     | AGAGCACTTATCGCCTGCTG     | 568887,568906                    | 569617,569598                    |
| wt16     | 4  | ATCGAGCCTGTCGGTGCCT      | ACGCCTTCGCTTTATGCGCCA    | 840246,840265                    | 840607,840587                    |
| mutL32   | 5  | CCCCCGTTTTGACTAAAATGCGCC | CGCTCTGTGCGTAACCGCCA     | 849410,849433                    | 849778,849759                    |
| M2m-25   | 1  | TGCCACTGCCGTCAATAAGT     | ATCTATTTGCAACCCCGCCA     | 986240,986259                    | 986728,986709                    |
| wt83     | 1  | AAGCGAGGTCGCTCCGTCAA     | ACAGCACCAGAGCCAGAATCCCA  | 1094838,1094857                  | 1095231,1095209                  |
| M88-29   | 5  | GTCATGGTTCCAGCCCAACT     | CGGCGAATGCTACTTTACGC     | 1101283,1101302                  | 1102042,1102023                  |
| wt7      | 1  | TGATGTCGCCAGGTGCTGCG     | AAGCTGGGCGCGAGAAGCAG     | 1370930,1370949                  | 1371310,1371291                  |
| wt92     | 5  | TCGTGGTTTTCTTCCCACGTAGCG | AAACCACGGGTTGCCCCGGT     | 1489012,1489034                  | 1489264,1489245                  |
| M88-76   | 5  | GTGAAGTTTTGCAGCCCTGG     | GTTGCGGTGGTTGTAACTGG     | 1543407,1543426                  | 1544037,1544018                  |
| M91-02   | 2  | TAGGCTGCTGTGGTGACATC     | TTGGCGGTACGGGAATACAC     | 1588469,1588488                  | 1589182,1589163                  |
| wt76     | 2  | CGCCGTGGCCGTCATAACCA     | GGACGGTTCCCACGGTGTCG     | 1594892,1594911                  | 1595145,1595126                  |
| M101-009 | 1  | AATACAGACAGCACACGCCC     | AGTTGTCAATGTGACTCGCCA    | 1701971,1701990                  | 1702659,1702639                  |
| wt7      | 5  | ACCTCCCTATTCCATGAGCAAGCA | TCCTGTGAGTCGCATACGGAACC  | 1777330,1777353                  | 1777634,1777612                  |
| M88-39   | 2  | TTCAACACCTTCCCGCAAGA     | GGCGTACCAAAGATCGACCA     | 1806898,1806917                  | 1807592,1807573                  |
| wt80     | 5  | CCCACAGCCACAACCGTCCC     | GTCGCAATTGCTATCGCCACCA   | 1856634,1856653                  | 1856960,1856939                  |
| mutL54   | 1  | GCCCACCGTTTGGCTTCGGT     | CAGCTGACATTGTTGCCTGG     | 1923303,1923322                  | 1923580,1923561                  |
| wt5      | 5  | GCCGTGCTCCAGTCGCCA       | TCTTGGCCTTGATGGTTTTAGCGT | 2000840,2000858                  | 2001130,2001107                  |
| M88-10   | 5  | TGCAACCTGCTGGTCTTTCA     | GAAACCGTTCTTCGCTGCTG     | 2188807,2188826                  | 2189492,2189473                  |
| M91-30   | 2  | GAAAGCACACGATATGCGCC     | TTGCGCATTTTTATCTCCGC     | 2313180,2313199                  | 2313921,2313902                  |
| M2m-53   | 5  | TCAGTCCCAAAACCGACACC     | GCCTCTTCAATTCGTTCCGC     | 2362173,2362192                  | 2362721,2362702                  |
| wt1      | 3  | GCCCAGTACGCTCACAGCCA     | CCGGCAGCATGGGACCCAAC     | 2487315,2487334                  | 2487632,2487613                  |
| M91-30   | 1  | GTCAGGCAACCAGTATGCGA     | ACATTGCCACAGGCAGAAGA     | 2627316,2627335                  | 2627853,2627834                  |
| mutL75   | 5  | AAAATGAGGTGCGTCGCGCT     | GGAGCAACACCCACAGACTCG    | 2755277,2755296                  | 2755584,2755563                  |

Continued on next page

S5 Table – continued from previous page

| Name     | IS  | Forward Primer (5'→3')    | Reverse Primer (5'→3')    | Forward Primer (5',3')-positions | Reverse Primer (5',3')-positions |
|----------|-----|---------------------------|---------------------------|----------------------------------|----------------------------------|
| mutL2    | 5   | CGAAGAAGTTGAAGGTACCTGGCCT | ACTAAAGCAACAGGTTAGGGGGAGT | 2786452,2786476                  | 2786817,2786793                  |
| M180-90  | 1   | GTAATGAACGGCAACGCTCC      | GGCGAACGAATGGGCTAAAC      | 2980053,2980072                  | 2980765,2980746                  |
| M88-16   | 5   | TCG TTCACATTCGGTCCAACA    | GGGCATGTGTGTATGTGCG       | 2986166,2986186                  | 2986899,2986880                  |
| M101-017 | 186 | GTTCAAATACGCGCAGACGG      | GTATGTGCTGATGAAGCCGC      | 3075418,3075437                  | 3076096,3076077                  |
| mutL15   | 1   | GCCACGCCTGGTGCAGAGAAT     | TTCAAAACACCGGTTTCCCTGCT   | 3077162,3077181                  | 3077453,3077431                  |
| mutL75   | 1   | CGCACACGCAGACGCAGAGT      | AAACGCTGGCGATCCGGCTT      | 3119469,3119488                  | 3119818,3119799                  |
| wt99     | 2   | TCACCACAGGCGATCATTCCCA    | CAATGCGTTGTCCGGTGCGA      | 3361222,3361243                  | 3361578,3361559                  |
| M101-081 | 1   | ATCAAGCTACCGCCAGGAAC      | CTTTAGTTGGTGCAGGTGCG      | 3435743,3435762                  | 3436397,3436378                  |
| wt16     | 1   | AAGCCAGATGCCAGCCCTCCT     | TGGACGGACTGGTCAGCGGTA     | 3455055,3455075                  | 3455390,3455370                  |
| wt71     | 1   | CTACCCCGGGCCCATGATGC      | TGTCGTCGTTCTGGCTGAAAATCA  | 3630991,3631010                  | 3631471,3631448                  |
| M101-007 | 5   | AAGCCTGAACGATAGCTGGG      | GCAACCCGACGATAAACAGC      | 3654505,3654524                  | 3655126,3655107                  |
| M40-25   | 5   | GCCGCCAGCTCATAACTCTC      | TGCTGTCTAAGTGCGACCTG      | 3718499,3718518                  | 3721249,3721230                  |
| M35-051  | 5   | ACGCCAGAAAAACCCAGTGA      | ACAGGTGGCTAATCCCAAGG      | 3766159,3766178                  | 3766860,3766841                  |
| M88-75   | 5   | GGCTATGTGGGCTGGAATGA      | TCCCGATCCAGGGAGAGATG      | 3896444,3896463                  | 3896971,3896952                  |
| mutL36   | 1   | TGCCACGAAGAACGGCTGGG      | TGACCCGTCTCCGGCAACCA      | 3914175,3914194                  | 3914484,3914465                  |
| wt93     | 1   | CCACTATCACGGAGTCGCTGGC    | CCACGCGCTTGCGTCTCTCA      | 4001014,4001035                  | 4001501,4001482                  |
| M88-09   | 2   | GTAGCAGTAAAACGCTCGCC      | TCAGATCGCTGGTTTGGGTG      | 4002362,400238                   | 4003089,4003070                  |
| M133-009 | 1   | CCCCACAGTGCTGATTTTGC      | CAGGTCGATATACCCCTGCG      | 4248503,4248522                  | 4249043,4249024                  |
| M101-097 | 1   | AAACGCTGACCACCCACAAA      | ACGAGCATATTGACCAGCCG      | 4274842,4274861                  | 4275363,4275344                  |
| M40-21   | 5   | GCTGGGCATCGTCAAATCC       | CGCTTTATTGCCGCCTCATC      | 4304431,4304450                  | 4304994,4304975                  |
| M40-21   | 2   | CGTGGAAGTAGCCTGTCTGG      | CACACCTGCCGTAACAAAGC      | 4341016,4341035                  | 4341877,4341858                  |
| wt83     | 1   | CTGGGGCGGGATTGCACTGG      | AGCGATTGCGGCACGGTTCA      | 4410232,4410251                  | 4410512,4410493                  |
| M2m-39   | 186 | GGCGGACTGGATTGAGTTGA      | ACAGCACGAAACCACAGTCA      | 4432453,4432472                  | 4433177,4433158                  |
| M88-46   | 1   | CCCGATGGGCGATAGAACTC      | TTATCCCGCATCACCTGTG       | 4495371,4495390                  | 4496164,4496145                  |
| M6-20    | 5   | TGCGCTCCATGAAATAGCCA      | CAAACCCACACGAATGGCGT      | 4538560,4538579                  | 4539427,4539408                  |
| M91-06   | 186 | CATCTAAAGCCGCTGTTGCC      | TCTCCACGGAAAGCACATC       | 4541403,4541422                  | 4542082,4542063                  |

**S6 Table. Primers used to confirm IS recombinations**

| Name      | IS | Forward Primer (5'→3')  | Reverse Primer (5'→3') | Forward Primer (5',3')-positions | Reverse Primer (5',3')-positions |
|-----------|----|-------------------------|------------------------|----------------------------------|----------------------------------|
| M88-19*   | 1  | AAACGAAGGCGAAGTAGCCA    | AACATGAGCGGCACGAGTAA   | 75096,75115                      | 84502,84483                      |
| M133-042* | 1  | GCGTGACGAGGAACACAATG    | CATGCCAGCAACGGTAACAC   | 278214,278233                    | 290753,290734                    |
| M2m-32    | 5  | TTGTGTCGTATCCGTCAGGG    | GGATCTTGGAGTATGGGGCG   | 570770,570789                    | 575140,575121                    |
| M35-076   | 5  | TTGTGTCGTATCCGTCAGGG    | AAATGCAGAAGTTTGGGCCG   | 570770,570789                    | 575341,575322                    |
| M94-13    | 5  | ATGTCACTGGCAGGTAAGCA    | TCCCTCCGAACAGGACGATA   | 573422,573441                    | 579459,579440                    |
| M101-073  | 5  | GGTTACAGAAGGCTGAGGGC    | CAGCCAAGAGCCATGAATAGG  | 573471,573490                    | 576224,576204                    |
| WT-100*   | 5  | GCCTTTTTTCAGCACGTTTCGAT | TCCCATATTTTCGGCACGCTC  | 675702,675722                    | 688540,688521                    |
| M6-1      | 1  | AACAGGCATTGGGTGCAATC    | TGCAGCTGGGTGTGTATTTTG  | 1195964,1195983                  | 1198622,1198602                  |
| M40-11*   | 5  | AATCGATAACGCCTGGGGTG    | GGGCTGACTTAGGGGACCAC   | 1393709,1393728                  | 1476854,1476835                  |
| M91-45*   | 5  | AATCGATAACGCCTGGGGTG    | ACAACCTGAACAAGTAAGGGCA | 1393709,1393728                  | 1432995,1432974                  |
| M101-075  | 1  | ATGTTGACCCCTTTTCGTCCC   | TAAACGCATTTCAGCGCAGTG  | 1751226,1751245                  | 1753025,1753006                  |
| M88-61*   | 1  | TCAAACGCTGTGCAAGTAGT    | TGAGGAAAACCTTCGAGCGGG  | 1976149,1976168                  | 1989197,1989178                  |
| M88-47*   | 1  | GCTGCAATAAGCAGAACCACC   | CACGTTTTTCACACCTGCTCG  | 1976331,1976351                  | 1987405,1987386                  |
| M88-10*   | 5  | GGCGTATCGGAGGAAGATCC    | GGTGGGGATCGTGTTAGGAC   | 3117028,3117047                  | 3129645,3129626                  |
| M40-28    | 1  | ATTACGAGGCCATCAGGCAG    | TTTTTCAGAACGTCGAACGGG  | 3579198,3579217                  | 3582613,3582593                  |
| M88-50    | 1  | ATTACGAGGCCATCAGGCAG    | TTTTTCAGAACGTCGAACGGG  | 3579198,3579217                  | 3582613,3582593                  |
| M91-69    | 1  | ATTACGAGGCCATCAGGCAG    | TTTTTCAGAACGTCGAACGGG  | 3579198,3579217                  | 3582613,3582593                  |
| M94-10    | 1  | ATTACGAGGCCATCAGGCAG    | TTTTTCAGAACGTCGAACGGG  | 3579198,3579217                  | 3582613,3582593                  |
| M133-105  | 1  | GCGCGGTTGAAGTAAGATAG    | TTTTTCAGAACGTCGAACGGG  | 3579635,3579654                  | 3582613,3582593                  |
| M94-39    | 1  | GAAGCACCGCTCAAGGAATC    | CGGGTACTAAGGTTAGCGG    | 3581124,3581143                  | 3583114,3583095                  |
| M40-40*   | 2  | GCCATAAAGCGACTCGAACG    | TCGCCCGGAAACCATGAATA   | 4516205,4516224                  | 4539124,4539105                  |

\* indicates amplicons in founder (no deletion) could not be amplified due to the large sizes.

S7 Table. 98 IS-associated recombinations

| Type | Line    | IS Family | Size   | Start   | End      | CP4-6 |
|------|---------|-----------|--------|---------|----------|-------|
| E+E  | mutL54  | IS5A      | 35594  | 2065377 | 21009678 |       |
| E+N  | wt70    | IS5A      | 35580  | 274375  | 309954   |       |
| E+N  | wt-100  | IS5A      | 11032  | 676037  | 687068   |       |
| E+N  | wt-63   | IS5A      | 106106 | 274378  | 380483   |       |
| E+N  | M6-7    | IS1A      | 207    | 290629  | 290832   |       |
| N+N  | M6-1    | IS1A      | 2358   | 1196110 | 1198468  |       |
| E+N  | M35-019 | IS5A      | 259    | 3129370 | 3129628  |       |
| E+N  | M35-016 | IS5A      | 310    | 3364778 | 3365087  |       |
| E+N  | M35-013 | IS1A      | 2044   | 3579410 | 3581453  |       |
| E+N  | M35-076 | IS5A      | 2787   | 571023  | 573809   |       |
| E+N  | M35-016 | IS5A      | 8189   | 575013  | 583201   |       |
| E+N  | M35-026 | IS5A      | 36223  | 274376  | 310599   |       |
| E+N  | M35-019 | IS2       | 91872  | 1467283 | 1559154  |       |
| E+N  | M40-11  | IS5A      | 1138   | 3648917 | 3650054  |       |
| E+N  | M40-28  | IS1A      | 1944   | 3579505 | 3581448  |       |
| E+N  | M40-16  | IS5A      | 2593   | 2100974 | 2103566  |       |
| E+N  | M40-33  | IS5A      | 2895   | 575013  | 577907   |       |
| E+N  | M40-42  | IS5A      | 4481   | 3651258 | 3655738  |       |
| E+N  | M40-11  | IS5A      | 5594   | 3129366 | 3134959  |       |
| N+N  | M40-50  | IS5A      | 8654   | 1622501 | 1631155  |       |
| E+N  | M40-33  | IS5A      | 9274   | 677793  | 687066   |       |
| N+N  | M40-55  | IS1A      | 12924  | 1599005 | 1611929  |       |
| E+N  | M40-40  | IS1B      | 21624  | 4517263 | 4538886  |       |
| N+N  | M40-16  | IS1A      | 27545  | 2873737 | 2901282  |       |
| E+N  | M40-35  | IS5A      | 81352  | 1395267 | 1476618  |       |
| E+N  | M40-11  | IS5A      | 81353  | 1395267 | 1476619  |       |
| E+E  | M40-11  | IS1A      | 11473  | 279154  | 290625   | Yes   |
| E+E  | M40-36  | IS1A      | 11473  | 279154  | 290625   | Yes   |
| E+E  | M40-56  | IS1A      | 11473  | 279154  | 290625   | Yes   |
| E+N  | M88-08  | IS5A      | 849    | 3129373 | 3130221  |       |
| E+N  | M88-50  | IS1A      | 887    | 3580566 | 3581452  |       |
| E+N  | M88-32  | IS1A      | 1401   | 1977460 | 1978907  |       |
| E+N  | M88-63  | IS1A      | 1475   | 3579974 | 3581448  |       |
| E+N  | M88-76  | IS5A      | 1626   | 575014  | 576639   |       |
| E+N  | M88-26  | IS1A      | 1066   | 1975616 | 1977451  |       |
| E+N  | M88-35  | IS1A      | 3654   | 1972916 | 1977451  |       |
| E+N  | M88-09  | IS5A      | 4703   | 682368  | 687070   |       |
| E+N  | M88-39  | IS5A      | 5749   | 3651258 | 3657006  |       |
| E+N  | M88-17  | IS1A      | 7401   | 1977460 | 1984904  |       |
| N+N  | M88-19  | IS1A      | 8901   | 75303   | 84333    |       |
| E+N  | M88-47  | IS1A      | 9601   | 1977459 | 1987130  |       |
| E+N  | M88-10  | IS5A      | 10957  | 3117210 | 3128166  |       |
| E+N  | M88-61  | IS1A      | 11001  | 1977459 | 1988532  |       |
| E+N  | M88-63  | IS1A      | 13289  | 1963393 | 1977451  |       |
| E+N  | M88-27  | IS1A      | 16654  | 1959940 | 1977451  |       |
| E+N  | M91-28  | IS5A      | 465    | 3363109 | 3363574  |       |
| E+N  | M91-28  | IS1A      | 1031   | 3580420 | 3581450  |       |
| E+N  | M91-69  | IS1A      | 2005   | 3579448 | 3581452  |       |
| E+N  | M91-70  | IS5A      | 4815   | 3129368 | 3134182  |       |

Continued on next page

S7 Table – continued from previous page

| Type | Line     | IS Family | Size  | Start   | End     | CP4-6 |
|------|----------|-----------|-------|---------|---------|-------|
| E+N  | M91-45   | IS5A      | 36917 | 1395267 | 1432183 |       |
| E+N  | M94-39   | IS1A      | 560   | 3582221 | 3582780 |       |
| E+N  | M94-10   | IS1A      | 1959  | 3579491 | 3581449 |       |
| E+N  | M94-13   | IS5A      | 4056  | 575016  | 579071  |       |
| E+N  | M94-54   | IS5A      | 8746  | 3119418 | 3128163 |       |
| E+N  | M101-017 | IS5A      | 452   | 3649604 | 3650055 |       |
| E+N  | M101-073 | IS5A      | 986   | 575015  | 576000  |       |
| E+N  | M101-033 | IS5A      | 1083  | 3648975 | 3650057 |       |
| N+N  | M101-075 | IS1A      | 1379  | 1751513 | 1752892 |       |
| E+N  | M101-049 | IS1A      | 1411  | 3580043 | 3581453 |       |
| E+N  | M101-043 | IS1A      | 1826  | 3579625 | 3581450 |       |
| E+N  | M101-085 | IS5A      | 2258  | 3651260 | 3653517 |       |
| N+N  | M101-083 | IS1A      | 8863  | 3851135 | 3859998 |       |
| E+N  | M101-035 | IS5A      | 27991 | 1395269 | 1423259 |       |
| E+N  | M101-039 | IS5A      | 48286 | 2100976 | 2149261 |       |
| E+E  | M101-079 | IS1A      | 11473 | 279154  | 290625  | Yes   |
| E+E  | M101-093 | IS1A      | 11473 | 279154  | 290625  | Yes   |
| N+N  | M133-113 | IS1A      | 162   | 2379405 | 2379567 |       |
| E+N  | M133-063 | IS5A      | 453   | 3649603 | 3650055 |       |
| E+N  | M133-115 | IS5A      | 615   | 3364776 | 3365390 |       |
| E+N  | M133-105 | IS1A      | 1508  | 3579941 | 3581448 |       |
| E+N  | M133-093 | IS1A      | 1808  | 3579643 | 3581450 |       |
| N+N  | M133-070 | IS5A      | 3964  | 1632879 | 1636843 |       |
| N+N  | M133-070 | IS5A      | 6846  | 3764113 | 3770959 |       |
| N+N  | M133-009 | IS1A      | 7770  | 2481518 | 2489288 |       |
| E+N  | M133-034 | IS5A      | 10196 | 274376  | 284571  |       |
| E+N  | M133-111 | IS5A      | 28250 | 274377  | 302626  |       |
| E+E  | M133-042 | IS1A      | 11473 | 279154  | 290625  | Yes   |
| E+E  | M133-092 | IS1A      | 11473 | 279154  | 290625  | Yes   |
| N+N  | M180-99  | IS5A      | 177   | 89170   | 89347   |       |
| E+N  | M180-85  | IS2       | 230   | 2068300 | 2068529 |       |
| E+N  | M180-88  | IS5A      | 608   | 3364777 | 3365384 |       |
| E+N  | M180-34  | IS5A      | 1338  | 3648715 | 3650052 |       |
| E+N  | M180-79  | IS5A      | 1912  | 3364777 | 3366688 |       |
| E+N  | M180-90  | IS1A      | 1927  | 3579525 | 3581451 |       |
| E+N  | M180-33  | IS5A      | 2693  | 571117  | 573809  |       |
| E+E  | M180-40  | IS5A      | 35594 | 2065377 | 2100970 |       |
| E+E  | M180-05  | IS1A      | 11473 | 279154  | 290625  | Yes   |
| E+E  | M180-38  | IS1A      | 11473 | 279154  | 290625  | Yes   |
| E+E  | M180-77  | IS1A      | 11473 | 279154  | 290625  | Yes   |
| E+E  | M180-83  | IS1A      | 11473 | 279154  | 290625  | Yes   |
| E+N  | M2m-41   | IS5A      | 220   | 3363358 | 3363570 |       |
| E+N  | M2m-44   | IS5A      | 544   | 3364776 | 3365319 |       |
| E+N  | M2m-39   | IS1A      | 1941  | 3579510 | 3581450 |       |
| E+N  | M2m-32   | IS5A      | 2667  | 571144  | 573810  |       |
| E+N  | M2m-33   | IS5A      | 2667  | 571144  | 573810  |       |
| E+N  | M2m-53   | IS5A      | 4072  | 575012  | 579083  |       |
| E+N  | M2m-41   | IS5A      | 27441 | 274375  | 301815  |       |
| E+E  | M2m-27   | IS1A      | 11473 | 279154  | 290625  | Yes   |

S8 Table. 758 IS insertions (\*gene name if an insertion lands on a protein-coding gene, 'NC' otherwise.)

| IS Family | Line     | Strand | Position | Gene name* |
|-----------|----------|--------|----------|------------|
| IS1A      | M180-27  | +      | 7594     | yaaJ       |
| IS1A      | M101-037 | -      | 11035    | yaaW       |
| IS1A      | M35-009  | -      | 42482    | fixA       |
| IS1A      | M88-19   | +      | 75303    | thiB       |
| IS1A      | M88-44   | -      | 83776    | NC         |
| IS1A      | M88-19   | +      | 84333    | NC         |
| IS1A      | M91-15   | +      | 84678    | leuO       |
| IS1A      | M35-039  | -      | 84705    | leuO       |
| IS1A      | M88-27   | +      | 85491    | NC         |
| IS1A      | M133-022 | +      | 154379   | htrE       |
| IS1A      | M133-020 | -      | 155485   | ecpD       |
| IS1A      | M101-013 | +      | 161295   | sfsA       |
| IS1A      | M6-7     | +      | 290832   | NC         |
| IS1A      | M180-32  | +      | 293053   | yagL       |
| IS1A      | M35-069  | -      | 317550   | NC         |
| IS1A      | M88-10   | +      | 318779   | ykgC       |
| IS1A      | M94-38   | +      | 377810   | frmA       |
| IS1A      | M88-16   | +      | 399314   | ddlA       |
| IS1A      | M35-004  | -      | 401220   | phoA       |
| IS1A      | M61-32   | -      | 414970   | sbcC       |
| IS1A      | wt16     | -      | 431673   | yajI       |
| IS1A      | M101-077 | -      | 480454   | NC         |
| IS1A      | M180-90  | -      | 535220   | hyi        |
| IS1A      | M133-085 | +      | 537033   | ybbW       |
| IS1A      | M101-019 | +      | 579323   | NC         |
| IS1A      | M94-13   | +      | 603627   | mscM       |
| IS1A      | M40-37   | +      | 637896   | NC         |
| IS1A      | M22-47   | +      | 651354   | NC         |
| IS1A      | M94-24   | -      | 676048   | ybeR       |
| IS1A      | M35-090  | -      | 678186   | ybeT       |
| IS1A      | M88-09   | -      | 819897   | NC         |
| IS1A      | M35-026  | +      | 819959   | NC         |
| IS1A      | M2m-15   | -      | 875583   | yliF       |
| IS1A      | M133-056 | +      | 915463   | NC         |
| IS1A      | M2m-83   | +      | 955517   | ycaO       |
| IS1A      | M2m-25   | -      | 986477   | NC         |
| IS1A      | M133-073 | -      | 996857   | NC         |
| IS1A      | M180-96  | +      | 1016986  | ycbZ       |
| IS1A      | M40-41   | +      | 1031468  | hyaA       |
| IS1A      | M88-18   | -      | 1049314  | insA       |
| IS1A      | M88-64   | -      | 1071695  | rutB       |
| IS1A      | wt83     | +      | 1095049  | NC         |
| IS1A      | M88-18   | +      | 1103090  | NC         |
| IS1A      | M91-19   | -      | 1107603  | opgC       |
| IS1A      | M133-073 | +      | 1108045  | opgC       |
| IS1A      | M133-056 | -      | 1119478  | solA       |
| IS1A      | M88-50   | +      | 1168513  | bhsA       |
| IS1A      | M88-37   | +      | 1180206  | ycfZ       |

Continued on next page

S8 Table – continued from previous page

| IS Family | Line     | Strand | Position | Gene name* |
|-----------|----------|--------|----------|------------|
| IS1A      | M6-1     | +      | 1196110  | ymfD       |
| IS1A      | M6-1     | +      | 1198468  | lit        |
| IS1A      | M94-33   | -      | 1208829  | NC         |
| IS1A      | M2m-84   | -      | 1278062  | narK       |
| IS1A      | M40-72   | +      | 1293106  | tdk        |
| IS1A      | wt-63    | -      | 1298535  | NC         |
| IS1A      | M101-069 | -      | 1307695  | kch        |
| IS1A      | M88-60   | +      | 1314403  | NC         |
| IS1A      | M2m-35   | +      | 1333083  | NC         |
| IS1A      | M2m-12   | -      | 1333523  | NC         |
| IS1A      | wt7      | +      | 1371109  | yecN       |
| IS1A      | M133-071 | +      | 1391916  | mppA       |
| IS1A      | M35-016  | +      | 1431986  | NC         |
| IS1A      | M101-029 | -      | 1480237  | NC         |
| IS1A      | M133-087 | +      | 1484652  | hrpA       |
| IS1A      | M35-069  | -      | 1524995  | yncH       |
| IS1A      | M133-103 | +      | 1529480  | NC         |
| IS1A      | M88-30   | -      | 1541563  | narU       |
| IS1A      | M88-08   | +      | 1543552  | NC         |
| IS1A      | M94-12   | -      | 1554589  | NC         |
| IS1A      | M88-27   | +      | 1584831  | NC         |
| IS1A      | M40-55   | +      | 1599005  | lsrR       |
| IS1A      | M40-55   | +      | 1611929  | sad        |
| IS1A      | M88-36   | -      | 1615003  | NC         |
| IS1A      | M35-008  | -      | 1621354  | ydeH       |
| IS1A      | M101-023 | -      | 1630351  | NC         |
| IS1A      | M35-099  | -      | 1647693  | dicB       |
| IS1A      | M101-019 | -      | 1659520  | ynfF       |
| IS1A      | M2m-44   | -      | 1687922  | ydgA       |
| IS1A      | M88-17   | +      | 1696213  | malI       |
| IS1A      | M101-009 | -      | 1702189  | ydgJ       |
| IS1A      | M91-20   | -      | 1728908  | lhr        |
| IS1A      | M101-075 | +      | 1751513  | ydhV       |
| IS1A      | M88-54   | -      | 1751531  | ydhV       |
| IS1A      | M91-08   | +      | 1752298  | ydhY       |
| IS1A      | M61-22   | +      | 1752603  | NC         |
| IS1A      | M101-075 | +      | 1752892  | NC         |
| IS1A      | M88-36   | -      | 1771721  | ydiN       |
| IS1A      | M101-039 | -      | 1776544  | ydiP       |
| IS1A      | M88-30   | +      | 1777191  | ydiP       |
| IS1A      | M88-45   | +      | 1823991  | astE       |
| IS1A      | M88-45   | +      | 1853873  | ydjG       |
| IS1A      | M35-090  | +      | 1857238  | ydjK       |
| IS1A      | M101-083 | -      | 1905942  | NC         |
| IS1A      | mutL54   | -      | 1923445  | NC         |
| IS1A      | M61-28   | -      | 1949069  | yecD       |
| IS1A      | M2m-78   | +      | 1950895  | cmoA       |
| IS1A      | M88-43   | -      | 1953080  | torZ       |
| IS1A      | M101-012 | +      | 1956052  | torY       |
| IS1A      | M88-27   | +      | 1959940  | NC         |

Continued on next page



S8 Table – continued from previous page

| IS Family | Line     | Strand | Position | Gene name* |
|-----------|----------|--------|----------|------------|
| IS1A      | M88-63   | +      | 1963393  | flhB       |
| IS1A      | M88-35   | +      | 1972916  | cheA       |
| IS1A      | M88-26   | +      | 1975616  | flhC       |
| IS1A      | M88-32   | +      | 1978907  | otsA       |
| IS1A      | M88-47   | +      | 1987130  | ftnA       |
| IS1A      | M88-61   | +      | 1988532  | tyrP       |
| IS1A      | M88-13   | +      | 2097920  | gnd        |
| IS1A      | M133-032 | -      | 2105551  | glf        |
| IS1A      | M88-41   | +      | 2127423  | wcaE       |
| IS1A      | M35-008  | -      | 2147228  | yegI       |
| IS1A      | M91-27   | +      | 2149127  | NC         |
| IS1A      | M2m-35   | -      | 2149358  | yegJ       |
| IS1A      | M88-62   | +      | 2211087  | yehU       |
| IS1A      | M101-043 | -      | 2232120  | preB       |
| IS1A      | M88-11   | -      | 2236555  | mglA       |
| IS1A      | M88-31   | -      | 2253295  | NC         |
| IS1A      | M2m-78   | -      | 2272956  | yejB       |
| IS1A      | M101-019 | +      | 2342314  | NC         |
| IS1A      | M133-133 | +      | 2379405  | elaA       |
| IS1A      | M133-133 | +      | 2379567  | NC         |
| IS1A      | M88-17   | +      | 2421159  | yfcI       |
| IS1A      | M101-003 | -      | 2432818  | NC         |
| IS1A      | M35-107  | -      | 2472660  | yfdQ       |
| IS1A      | M133-016 | +      | 2473070  | yfdR       |
| IS1A      | M101-033 | +      | 2475433  | dsdC       |
| IS1A      | M91-29   | -      | 2480126  | emrY       |
| IS1A      | M133-009 | +      | 2481518  | NC         |
| IS1A      | M2m-14   | -      | 2484328  | evgS       |
| IS1A      | M180-96  | +      | 2488911  | oxc        |
| IS1A      | M133-009 | +      | 2489288  | oxc        |
| IS1A      | M88-20   | -      | 2491631  | NC         |
| IS1A      | M91-22   | +      | 2507040  | glk        |
| IS1A      | M101-047 | -      | 2626709  | yfgF       |
| IS1A      | M88-16   | +      | 2627161  | NC         |
| IS1A      | M91-30   | -      | 2627540  | NC         |
| IS1A      | wt-41    | +      | 2651608  | NC         |
| IS1A      | wt-65    | -      | 2660634  | trmJ       |
| IS1A      | M88-31   | +      | 2698161  | shoB       |
| IS1A      | M88-45   | -      | 2771275  | NC         |
| IS1A      | M35-026  | +      | 2802237  | nrdF       |
| IS1A      | M40-29   | +      | 2858396  | pphB       |
| IS1A      | M40-16   | +      | 2873737  | cysD       |
| IS1A      | M2m-83   | -      | 2880158  | casC       |
| IS1A      | M40-16   | +      | 2901282  | ygcE       |
| IS1A      | M180-90  | -      | 2980363  | NC         |
| IS1A      | M35-013  | +      | 2985438  | NC         |
| IS1A      | M180-01  | +      | 3005309  | ygeW       |
| IS1A      | M133-097 | +      | 3028965  | NC         |
| IS1A      | M40-51   | +      | 3030853  | yqfG       |
| IS1A      | mutL15   | +      | 3077317  | cmtB       |

Continued on next page

S8 Table – continued from previous page

| IS Family | Line     | Strand | Position | Gene name* |
|-----------|----------|--------|----------|------------|
| IS1A      | mutL75   | -      | 3119617  | NC         |
| IS1A      | M6-1     | -      | 3134179  | pitB       |
| IS1A      | M101-077 | +      | 3144682  | yghW       |
| IS1A      | M88-31   | -      | 3165634  | ygiS       |
| IS1A      | wt42     | -      | 3165745  | NC         |
| IS1A      | M88-27   | +      | 3170473  | NC         |
| IS1A      | M88-49   | +      | 3183240  | NC         |
| IS1A      | wt-12    | -      | 3188661  | yqiI       |
| IS1A      | M2m-35   | +      | 3251332  | NC         |
| IS1A      | M180-19  | +      | 3263727  | tdcB       |
| IS1A      | M91-08   | +      | 3292196  | lpoA       |
| IS1A      | M40-47   | -      | 3319577  | yhbX       |
| IS1A      | M88-36   | +      | 3346660  | yrbL       |
| IS1A      | M22-64   | +      | 3359599  | gltF       |
| IS1A      | M101-081 | +      | 3436016  | NC         |
| IS1A      | wt16     | +      | 3455186  | gspD       |
| IS1A      | M35-013  | +      | 3579410  | yhhY       |
| IS1A      | M91-69   | +      | 3579448  | yhhY       |
| IS1A      | M94-10   | +      | 3579491  | yhhY       |
| IS1A      | M40-28   | +      | 3579505  | yhhY       |
| IS1A      | M2m-39   | +      | 3579510  | yhhY       |
| IS1A      | M180-90  | +      | 3579525  | yhhY       |
| IS1A      | M101-043 | +      | 3579625  | yhhY       |
| IS1A      | M133-093 | +      | 3579643  | yhhY       |
| IS1A      | M133-105 | +      | 3579941  | yhhZ       |
| IS1A      | M88-63   | +      | 3579974  | yhhZ       |
| IS1A      | M101-049 | +      | 3580043  | yhhZ       |
| IS1A      | M91-28   | +      | 3580420  | yhhZ       |
| IS1A      | M88-50   | +      | 3580566  | yhhZ       |
| IS1A      | M2m-92   | -      | 3580582  | yhhZ       |
| IS1A      | M94-39   | +      | 3582780  | NC         |
| IS1A      | M88-08   | -      | 3595996  | NC         |
| IS1A      | wt71     | +      | 3631241  | NC         |
| IS1A      | M133-022 | -      | 3633174  | yhiM       |
| IS1A      | M94-51   | +      | 3669487  | yhjB       |
| IS1A      | M2m-38   | -      | 3672012  | yhjD       |
| IS1A      | wt-62    | -      | 3706523  | NC         |
| IS1A      | M2m-83   | -      | 3724195  | wecH       |
| IS1A      | M180-77  | -      | 3724785  | wecH       |
| IS1A      | M88-16   | -      | 3767039  | NC         |
| IS1A      | M101-009 | -      | 3767663  | NC         |
| IS1A      | M101-005 | -      | 3767988  | NC         |
| IS1A      | M35-009  | -      | 3795444  | rfaL       |
| IS1A      | M40-33   | +      | 3798227  | NC         |
| IS1A      | M2m-04   | +      | 3799251  | rfaJ       |
| IS1A      | M2m-93   | -      | 3803049  | rfaS       |
| IS1A      | M101-083 | +      | 3851135  | NC         |
| IS1A      | M101-083 | +      | 3859998  | NC         |
| IS1A      | M40-45   | +      | 3887994  | tnaA       |
| IS1A      | mutL36   | -      | 3914303  | atpD       |

Continued on next page

S8 Table – continued from previous page

| IS Family | Line     | Strand | Position | Gene name* |
|-----------|----------|--------|----------|------------|
| IS1A      | M133-111 | +      | 3984410  | NC         |
| IS1A      | wt93     | -      | 4001320  | rarD       |
| IS1A      | M101-061 | +      | 4059991  | yihM       |
| IS1A      | M6-24    | +      | 4077818  | yiiF       |
| IS1A      | M101-079 | +      | 4084986  | NC         |
| IS1A      | M133-093 | -      | 4085987  | yiiG       |
| IS1A      | M94-17   | -      | 4086695  | frvR       |
| IS1A      | M88-45   | +      | 4090966  | NC         |
| IS1A      | M180-62  | +      | 4111500  | uspD       |
| IS1A      | M88-76   | -      | 4119933  | hslV       |
| IS1A      | M88-33   | +      | 4219036  | arpA       |
| IS1A      | M91-22   | +      | 4220056  | arpA       |
| IS1A      | M101-069 | -      | 4220952  | iclR       |
| IS1A      | M180-34  | +      | 4233547  | NC         |
| IS1A      | M133-009 | +      | 4248632  | NC         |
| IS1A      | M40-64   | +      | 4258555  | yjbL       |
| IS1A      | M133-022 | +      | 4258719  | yjbM       |
| IS1A      | M101-097 | -      | 4275133  | soxS       |
| IS1A      | M101-043 | -      | 4280003  | yjcF       |
| IS1A      | M101-012 | -      | 4280920  | yjcF       |
| IS1A      | M88-75   | -      | 4333405  | eptA       |
| IS1A      | M133-054 | +      | 4350160  | yjdJ       |
| IS1A      | M40-62   | +      | 4359339  | cadC       |
| IS1A      | M40-41   | +      | 4381840  | NC         |
| IS1A      | wt83     | -      | 4410383  | yjfl       |
| IS1A      | M35-048  | +      | 4457272  | pmbA       |
| IS1A      | M35-013  | +      | 4495303  | NC         |
| IS1A      | M88-46   | -      | 4495844  | NC         |
| IS1A      | M133-111 | +      | 4524185  | sgcR       |
| IS1A      | M101-061 | -      | 4538681  | NC         |
| IS1A      | M88-46   | -      | 4539894  | NC         |
| IS1A      | M101-079 | -      | 4567036  | NC         |
| IS1A      | wt-66    | +      | 4597007  | opgB       |
| IS1A      | M133-001 | -      | 4604005  | yjjZ       |
| IS1A      | M35-013  | +      | 4609115  | NC         |
| IS1B      | M40-06   | -      | 2627081  | NC         |
| IS1B      | M180-71  | +      | 4067287  | yihQ       |
| IS1B      | M40-40   | +      | 4538886  | NC         |
| IS150     | wt-62    | +      | 3720098  | NC         |
| IS150     | M2m-04   | +      | 4596946  | opgB       |
| IS186     | M133-095 | -      | 272215   | NC         |
| IS186     | M35-026  | -      | 272216   | NC         |
| IS186     | M88-19   | -      | 272216   | NC         |
| IS186     | M91-35   | +      | 272216   | NC         |
| IS186     | M88-43   | +      | 357276   | cynR       |
| IS186     | M133-003 | +      | 458017   | NC         |
| IS186     | M35-078  | +      | 458017   | NC         |
| IS186     | M101-015 | -      | 730884   | rhsC       |
| IS186     | M101-005 | +      | 838455   | NC         |
| IS186     | M101-033 | -      | 838456   | NC         |

Continued on next page

S8 Table – continued from previous page

| IS Family | Line     | Strand | Position | Gene name* |
|-----------|----------|--------|----------|------------|
| IS186     | M40-47   | +      | 838456   | NC         |
| IS186     | M91-06   | -      | 838456   | NC         |
| IS186     | M2m-38   | -      | 944137   | NC         |
| IS186     | M133-081 | -      | 944138   | NC         |
| IS186     | M35-076  | +      | 1201171  | ymfJ       |
| IS186     | M2m-44   | -      | 1237442  | dadA       |
| IS186     | M2m-28   | +      | 1301341  | oppB       |
| IS186     | M2m-14   | +      | 1349224  | NC         |
| IS186     | M2m-93   | +      | 1391483  | mppA       |
| IS186     | M40-51   | +      | 1501223  | NC         |
| IS186     | M2m-93   | -      | 1716536  | anmK       |
| IS186     | M35-099  | -      | 2011383  | fliF       |
| IS186     | wt-63    | +      | 2151686  | NC         |
| IS186     | M35-026  | +      | 2295405  | ccmA       |
| IS186     | M133-011 | +      | 2306776  | alkB       |
| IS186     | M2m-47   | +      | 2370465  | arnT       |
| IS186     | M35-004  | +      | 2373851  | menC       |
| IS186     | M133-007 | -      | 2373852  | menC       |
| IS186     | M2m-26   | +      | 2373852  | menC       |
| IS186     | M2m-32   | -      | 2373852  | menC       |
| IS186     | M2m-33   | -      | 2373852  | menC       |
| IS186     | M2m-43   | -      | 2373852  | menC       |
| IS186     | M35-051  | -      | 2373852  | menC       |
| IS186     | M40-36   | -      | 2373852  | menC       |
| IS186     | M88-19   | +      | 2373852  | menC       |
| IS186     | M91-35   | +      | 2373852  | menC       |
| IS186     | wt92     | -      | 2373852  | menC       |
| IS186     | M88-18   | -      | 2599808  | hyfA       |
| IS186     | M2m-12   | -      | 2599809  | hyfA       |
| IS186     | wt-41    | -      | 2599809  | hyfA       |
| IS186     | M35-016  | +      | 2836343  | ascG       |
| IS186     | M2m-09   | -      | 2953118  | recB       |
| IS186     | M2m-79   | +      | 2953118  | recB       |
| IS186     | M91-20   | -      | 2953118  | recB       |
| IS186     | wt-44    | +      | 2953118  | recB       |
| IS186     | M133-101 | +      | 2953119  | recB       |
| IS186     | M101-017 | -      | 3075738  | cmtA       |
| IS186     | M35-048  | +      | 3075739  | cmtA       |
| IS186     | M88-64   | -      | 4231417  | NC         |
| IS186     | M2m-39   | -      | 4432836  | cpdB       |
| IS186     | M133-115 | -      | 4438272  | ytfL       |
| IS186     | M101-019 | +      | 4541633  | fimA       |
| IS186     | M101-073 | +      | 4541633  | fimA       |
| IS186     | M2m-18   | -      | 4541633  | fimA       |
| IS186     | M2m-78   | +      | 4541633  | fimA       |
| IS186     | M40-36   | +      | 4541633  | fimA       |
| IS186     | M40-72   | +      | 4541633  | fimA       |
| IS186     | M6-19    | -      | 4541633  | fimA       |
| IS186     | M91-06   | +      | 4541633  | fimA       |
| IS186     | M101-005 | -      | 4541634  | fimA       |

Continued on next page

S8 Table – continued from previous page

| IS Family | Line     | Strand | Position | Gene name* |
|-----------|----------|--------|----------|------------|
| IS186     | M133-001 | +      | 4541634  | fimA       |
| IS186     | M2m-51   | -      | 4541634  | fimA       |
| IS186     | M35-099  | -      | 4541634  | fimA       |
| IS186     | M88-32   | +      | 4541634  | fimA       |
| IS186     | M91-27   | +      | 4541634  | fimA       |
| IS186     | wt-06    | -      | 4541634  | fimA       |
| IS186     | wt-62    | -      | 4541634  | fimA       |
| IS186     | M101-063 | +      | 4628606  | NC         |
| IS2       | M133-050 | +      | 292152   | yagK       |
| IS2       | M88-17   | +      | 310225   | matA       |
| IS2       | M133-061 | -      | 344127   | yahL       |
| IS2       | M133-018 | +      | 562856   | sfmF       |
| IS2       | M101-083 | +      | 563142   | fimZ       |
| IS2       | M88-44   | -      | 569302   | ybcK       |
| IS2       | M22-03   | +      | 570267   | ybcL       |
| IS2       | M91-01   | -      | 571223   | ybcM       |
| IS2       | M2m-38   | +      | 571894   | ybcN       |
| IS2       | M35-077  | +      | 572190   | ninE       |
| IS2       | M101-075 | -      | 573487   | quuD       |
| IS2       | wt-17    | +      | 585418   | envY       |
| IS2       | M2m-91   | +      | 602860   | mscM       |
| IS2       | M2m-53   | +      | 629110   | NC         |
| IS2       | M88-31   | -      | 948765   | ycaN       |
| IS2       | M2m-12   | +      | 1037565  | appC       |
| IS2       | wt-62    | -      | 1207435  | tfaP       |
| IS2       | M35-076  | +      | 1208994  | pinE       |
| IS2       | M2m-12   | -      | 1215540  | ymgA       |
| IS2       | M35-069  | +      | 1216280  | NC         |
| IS2       | M180-99  | -      | 1432220  | ynaE       |
| IS2       | M133-087 | +      | 1541753  | narU       |
| IS2       | M35-019  | +      | 1559154  | ddpA       |
| IS2       | M88-47   | -      | 1585983  | ydeR       |
| IS2       | M40-06   | -      | 1587517  | NC         |
| IS2       | M133-052 | +      | 1587600  | NC         |
| IS2       | M35-008  | +      | 1588643  | NC         |
| IS2       | M91-02   | +      | 1588719  | NC         |
| IS2       | M133-070 | -      | 1594220  | NC         |
| IS2       | M2m-05   | +      | 1594416  | NC         |
| IS2       | wt76     | -      | 1595034  | NC         |
| IS2       | M133-071 | +      | 1630901  | NC         |
| IS2       | M88-60   | +      | 1635420  | ydfO       |
| IS2       | M35-016  | -      | 1641890  | ydfU       |
| IS2       | M91-33   | +      | 1647723  | dicB       |
| IS2       | M2m-11   | +      | 1649169  | NC         |
| IS2       | M88-41   | +      | 1649992  | NC         |
| IS2       | M2m-39   | +      | 1650326  | NC         |
| IS2       | M6-17    | +      | 1650376  | NC         |
| IS2       | M88-26   | -      | 1650557  | NC         |
| IS2       | M2m-01   | -      | 1669981  | NC         |
| IS2       | M91-68   | +      | 1771328  | ydiN       |

Continued on next page

S8 Table – continued from previous page

| IS Family | Line     | Strand | Position | Gene name* |
|-----------|----------|--------|----------|------------|
| IS2       | M40-41   | -      | 1801481  | NC         |
| IS2       | M91-45   | +      | 1801772  | NC         |
| IS2       | M88-39   | -      | 1807370  | NC         |
| IS2       | M133-050 | +      | 1840207  | NC         |
| IS2       | M35-069  | -      | 1868629  | yeaI       |
| IS2       | M88-44   | -      | 2036931  | NC         |
| IS2       | M180-85  | +      | 2068529  | NC         |
| IS2       | M2m-93   | +      | 2285899  | NC         |
| IS2       | M91-30   | +      | 2313675  | rcsD       |
| IS2       | M180-38  | -      | 2318097  | atoS       |
| IS2       | M101-013 | +      | 2363391  | ais        |
| IS2       | M180-19  | +      | 2379151  | elaA       |
| IS2       | M133-009 | -      | 2468821  | NC         |
| IS2       | M2m-05   | +      | 2758783  | yfjJ       |
| IS2       | M91-02   | +      | 2764555  | rnlA       |
| IS2       | M91-52   | -      | 3289743  | yraK       |
| IS2       | wt99     | -      | 3361375  | yhcD       |
| IS2       | M35-009  | -      | 3361721  | yhcD       |
| IS2       | M101-019 | +      | 3363402  | NC         |
| IS2       | M6-1     | -      | 3364814  | NC         |
| IS2       | M2m-91   | +      | 3365126  | yhcF       |
| IS2       | M88-38   | +      | 3900420  | bglB       |
| IS2       | M88-09   | -      | 4002843  | NC         |
| IS2       | M40-21   | +      | 4341448  | melB       |
| IS2       | M91-33   | +      | 4346539  | dcuB       |
| IS2       | M133-011 | +      | 4383823  | yjeO       |
| IS2       | M91-69   | +      | 4537728  | NC         |
| IS2       | M2m-91   | +      | 4540332  | fimE       |
| IS2       | M133-070 | +      | 4569664  | NC         |
| IS3       | M2m-78   | -      | 292033   | yagK       |
| IS3       | wt90     | +      | 315698   | NC         |
| IS3       | M2m-78   | +      | 1200206  | xisE       |
| IS3       | M2m-26   | +      | 1636134  | NC         |
| IS3       | M2m-83   | +      | 1905625  | NC         |
| IS3       | wt1      | -      | 2487459  | yfdV       |
| IS3       | M2m-95   | -      | 2771070  | NC         |
| IS3       | M2m-33   | +      | 3580281  | yhhZ       |
| IS3       | M2m-84   | +      | 3768435  | yibH       |
| IS3       | M40-07   | +      | 3795898  | rfaL       |
| IS4       | M133-020 | +      | 415409   | sbcD       |
| IS4       | wt16     | +      | 840455   | fiu        |
| IS4       | M101-039 | +      | 884429   | ybjH       |
| IS4       | M61-27   | -      | 3383859  | NC         |
| IS4       | M35-077  | -      | 3480628  | yheS       |
| IS4       | M133-046 | -      | 3929199  | NC         |
| IS4       | M180-36  | +      | 3929199  | NC         |
| IS4       | M35-107  | +      | 3929200  | NC         |
| IS5A      | M180-99  | +      | 89170    | NC         |
| IS5A      | M180-99  | +      | 89347    | NC         |
| IS5A      | M91-32   | +      | 149838   | yadC       |

Continued on next page

S8 Table – continued from previous page

| IS Family | Line     | Strand | Position | Gene name* |
|-----------|----------|--------|----------|------------|
| IS5A      | M101-079 | -      | 149940   | yadC       |
| IS5A      | M40-61   | -      | 152393   | yadM       |
| IS5A      | M35-108  | -      | 153896   | htrE       |
| IS5A      | M35-026  | -      | 234050   | gloB       |
| IS5A      | M40-07   | -      | 246341   | dinJ       |
| IS5A      | M91-37   | +      | 252775   | yafP       |
| IS5A      | M91-20   | -      | 253159   | yafP       |
| IS5A      | M6-26    | -      | 259409   | NC         |
| IS5A      | M133-034 | +      | 284571   | NC         |
| IS5A      | M133-046 | -      | 292080   | yagK       |
| IS5A      | M88-38   | +      | 292373   | NC         |
| IS5A      | wt1      | +      | 294308   | NC         |
| IS5A      | M2m-41   | +      | 301815   | NC         |
| IS5A      | M133-111 | +      | 302626   | yagU       |
| IS5A      | wt70     | +      | 309954   | NC         |
| IS5A      | M35-026  | +      | 310599   | NC         |
| IS5A      | M133-046 | -      | 310602   | NC         |
| IS5A      | wt-41    | +      | 310603   | NC         |
| IS5A      | M88-33   | +      | 310889   | NC         |
| IS5A      | M88-17   | -      | 316004   | NC         |
| IS5A      | mutL25   | -      | 317205   | ykgB       |
| IS5A      | M35-076  | +      | 318093   | ykgC       |
| IS5A      | mutL38   | +      | 318692   | ykgC       |
| IS5A      | M40-68   | -      | 319407   | NC         |
| IS5A      | M88-41   | -      | 319407   | NC         |
| IS5A      | M91-06   | +      | 324785   | NC         |
| IS5A      | wt99     | -      | 330568   | betT       |
| IS5A      | M180-50  | +      | 344143   | yahL       |
| IS5A      | M2m-84   | +      | 345651   | NC         |
| IS5A      | wt-63    | +      | 380483   | NC         |
| IS5A      | M88-33   | -      | 380553   | NC         |
| IS5A      | M40-36   | -      | 384388   | NC         |
| IS5A      | M94-33   | -      | 393573   | NC         |
| IS5A      | M40-35   | -      | 484961   | NC         |
| IS5A      | M35-048  | +      | 512570   | ybaT       |
| IS5A      | M91-58   | +      | 515838   | ybbM       |
| IS5A      | M133-113 | +      | 538411   | allB       |
| IS5A      | M101-039 | -      | 542746   | ylbA       |
| IS5A      | M133-009 | +      | 543612   | allC       |
| IS5A      | M133-028 | +      | 568268   | ybcK       |
| IS5A      | M180-88  | +      | 569816   | NC         |
| IS5A      | M35-076  | +      | 571023   | ybcM       |
| IS5A      | M180-33  | +      | 571117   | ybcM       |
| IS5A      | M2m-32   | +      | 571144   | ybcM       |
| IS5A      | M2m-33   | +      | 571144   | ybcM       |
| IS5A      | M101-073 | +      | 576000   | NC         |
| IS5A      | M35-008  | +      | 576002   | NC         |
| IS5A      | M88-76   | +      | 576639   | essD       |
| IS5A      | M40-33   | +      | 577907   | borD       |
| IS5A      | M94-13   | +      | 579071   | NC         |

Continued on next page

S8 Table – continued from previous page

| IS Family | Line     | Strand | Position | Gene name* |
|-----------|----------|--------|----------|------------|
| IS5A      | M2m-53   | +      | 579083   | NC         |
| IS5A      | M35-016  | +      | 583201   | appY       |
| IS5A      | M88-39   | -      | 602647   | mscM       |
| IS5A      | M133-097 | +      | 636972   | NC         |
| IS5A      | M180-01  | -      | 654493   | dcuC       |
| IS5A      | wt-41    | -      | 654988   | dcuC       |
| IS5A      | wt-100   | +      | 676037   | ybeR       |
| IS5A      | M40-33   | +      | 677793   | djlB       |
| IS5A      | M88-09   | +      | 682368   | hscC       |
| IS5A      | M101-041 | -      | 728703   | NC         |
| IS5A      | M6-14    | -      | 735420   | ybfC       |
| IS5A      | M133-073 | -      | 735559   | NC         |
| IS5A      | M88-38   | +      | 737806   | ybfD       |
| IS5A      | M35-014  | -      | 820139   | ybhM       |
| IS5A      | mutL32   | -      | 849642   | NC         |
| IS5A      | M101-041 | +      | 872016   | gsiD       |
| IS5A      | wt-38    | -      | 888893   | ybjL       |
| IS5A      | M40-17   | +      | 988273   | NC         |
| IS5A      | M101-023 | -      | 1005000  | pyrD       |
| IS5A      | M40-23   | +      | 1050567  | NC         |
| IS5A      | M101-049 | +      | 1050689  | cspG       |
| IS5A      | M91-08   | +      | 1051003  | NC         |
| IS5A      | M88-21   | -      | 1078536  | putP       |
| IS5A      | M88-62   | -      | 1092122  | yedT       |
| IS5A      | mutL25   | -      | 1094885  | NC         |
| IS5A      | M40-47   | -      | 1101438  | csgE       |
| IS5A      | M88-29   | +      | 1101672  | csgE       |
| IS5A      | M94-35   | +      | 1101672  | csgE       |
| IS5A      | M6-1     | +      | 1102662  | NC         |
| IS5A      | M133-030 | -      | 1104947  | ymdA       |
| IS5A      | M91-40   | -      | 1108383  | NC         |
| IS5A      | M40-40   | +      | 1120203  | NC         |
| IS5A      | M133-097 | +      | 1122273  | yceB       |
| IS5A      | M91-30   | +      | 1195750  | NC         |
| IS5A      | M133-069 | -      | 1196401  | ymfD       |
| IS5A      | M180-36  | +      | 1196603  | ymfD       |
| IS5A      | M91-35   | +      | 1208408  | NC         |
| IS5A      | M35-107  | +      | 1211928  | ycgX       |
| IS5A      | M40-55   | +      | 1213536  | ycgF       |
| IS5A      | M40-39   | +      | 1221485  | NC         |
| IS5A      | M133-054 | +      | 1241368  | NC         |
| IS5A      | M2m-93   | -      | 1255915  | NC         |
| IS5A      | M35-113  | +      | 1292421  | NC         |
| IS5A      | M101-017 | -      | 1306984  | yciY       |
| IS5A      | M101-037 | -      | 1313111  | yciE       |
| IS5A      | M61-1    | -      | 1313414  | yciF       |
| IS5A      | M94-47   | -      | 1342761  | NC         |
| IS5A      | M91-01   | +      | 1366158  | pspA       |
| IS5A      | M91-45   | -      | 1369478  | ycjM       |
| IS5A      | M91-32   | -      | 1370154  | ycjN       |

Continued on next page



S8 Table – continued from previous page

| IS Family | Line     | Strand | Position | Gene name* |
|-----------|----------|--------|----------|------------|
| IS5A      | M40-10   | +      | 1380950  | NC         |
| IS5A      | M22-71   | -      | 1397616  | NC         |
| IS5A      | M133-001 | +      | 1402892  | abgR       |
| IS5A      | M101-035 | +      | 1423259  | trkG       |
| IS5A      | M133-067 | +      | 1430513  | tfaR       |
| IS5A      | M133-069 | +      | 1430513  | tfaR       |
| IS5A      | @M40-28  | -      | 1430513  | tfaR       |
| IS5A      | M91-45   | +      | 1432183  | ynaE       |
| IS5A      | M2m-32   | +      | 1432191  | ynaE       |
| IS5A      | M91-33   | +      | 1432191  | ynaE       |
| IS5A      | M133-103 | -      | 1468984  | NC         |
| IS5A      | M2m-51   | +      | 1475141  | ydbD       |
| IS5A      | M40-35   | +      | 1476618  | ynbB       |
| IS5A      | M40-11   | +      | 1476619  | ynbB       |
| IS5A      | M40-55   | -      | 1476620  | ynbB       |
| IS5A      | wt92     | -      | 1489145  | cybB       |
| IS5A      | M91-38   | -      | 1489869  | ydcA       |
| IS5A      | wt-44    | -      | 1490568  | trg        |
| IS5A      | M40-45   | +      | 1527780  | NC         |
| IS5A      | M40-11   | -      | 1528257  | ydcD       |
| IS5A      | M2m-83   | -      | 1543202  | NC         |
| IS5A      | M88-76   | +      | 1543754  | NC         |
| IS5A      | M133-111 | -      | 1565420  | NC         |
| IS5A      | M180-90  | +      | 1570156  | NC         |
| IS5A      | M35-004  | +      | 1576881  | yddA       |
| IS5A      | M133-032 | -      | 1579046  | ydeN       |
| IS5A      | M88-64   | -      | 1580960  | ydeO       |
| IS5A      | M133-034 | +      | 1596484  | NC         |
| IS5A      | M88-09   | -      | 1596567  | NC         |
| IS5A      | M35-107  | +      | 1613897  | yneK       |
| IS5A      | M133-009 | +      | 1620585  | NC         |
| IS5A      | M94-15   | -      | 1621914  | NC         |
| IS5A      | M88-36   | -      | 1622498  | ydeI       |
| IS5A      | M40-50   | +      | 1622501  | ydeI       |
| IS5A      | M133-054 | -      | 1622556  | NC         |
| IS5A      | M40-50   | +      | 1631155  | ydfK       |
| IS5A      | M133-070 | +      | 1632879  | tfaQ       |
| IS5A      | M133-070 | +      | 1636843  | NC         |
| IS5A      | M88-46   | +      | 1636846  | NC         |
| IS5A      | M180-15  | -      | 1637300  | rzpQ       |
| IS5A      | M180-27  | +      | 1645300  | NC         |
| IS5A      | M88-20   | -      | 1650215  | NC         |
| IS5A      | M40-56   | -      | 1674487  | pntA       |
| IS5A      | M133-052 | -      | 1690399  | uidC       |
| IS5A      | M2m-05   | -      | 1708440  | rsxG       |
| IS5A      | M133-093 | -      | 1751464  | ydhV       |
| IS5A      | wt7      | +      | 1777498  | NC         |
| IS5A      | M101-043 | +      | 1785537  | ppsR       |
| IS5A      | M88-49   | -      | 1789622  | cdgR       |
| IS5A      | M2m-94   | +      | 1816668  | chbR       |

Continued on next page

S8 Table – continued from previous page

| IS Family | Line     | Strand | Position | Gene name* |
|-----------|----------|--------|----------|------------|
| IS5A      | M88-38   | +      | 1823981  | astE       |
| IS5A      | M40-45   | +      | 1854472  | ydjH       |
| IS5A      | M2m-26   | +      | 1854473  | ydjH       |
| IS5A      | M133-085 | +      | 1854494  | ydjH       |
| IS5A      | M40-40   | +      | 1854494  | ydjH       |
| IS5A      | wt80     | +      | 1856786  | ydjJ       |
| IS5A      | wt-35    | +      | 1878836  | NC         |
| IS5A      | M91-38   | +      | 1892440  | yoaC       |
| IS5A      | wt-100   | -      | 1892441  | yoaC       |
| IS5A      | M40-21   | -      | 1903339  | NC         |
| IS5A      | M88-67   | +      | 1970293  | tar        |
| IS5A      | M35-019  | +      | 1976906  | insB       |
| IS5A      | M35-069  | +      | 1977512  | NC         |
| IS5A      | wt-29    | -      | 1984781  | NC         |
| IS5A      | wt5      | +      | 2000983  | fliC       |
| IS5A      | M40-28   | -      | 2009993  | NC         |
| IS5A      | M180-71  | -      | 2022180  | rcsA       |
| IS5A      | M101-019 | +      | 2038746  | yedZ       |
| IS5A      | M88-47   | +      | 2039659  | zinT       |
| IS5A      | M101-029 | +      | 2066221  | NC         |
| IS5A      | M101-013 | -      | 2086869  | yeeZ       |
| IS5A      | M133-018 | -      | 2087870  | NC         |
| IS5A      | M101-033 | -      | 2101610  | wbbK       |
| IS5A      | M40-06   | +      | 2101610  | wbbK       |
| IS5A      | M91-52   | -      | 2101610  | wbbK       |
| IS5A      | M40-16   | +      | 2103566  | wbbI       |
| IS5A      | M101-015 | +      | 2104052  | wbbI       |
| IS5A      | M101-031 | +      | 2106664  | rfbX       |
| IS5A      | M2m-24   | +      | 2106665  | rfbX       |
| IS5A      | M35-077  | -      | 2121610  | cpsB       |
| IS5A      | M180-09  | +      | 2128306  | wcaD       |
| IS5A      | M88-19   | -      | 2135707  | NC         |
| IS5A      | M88-41   | -      | 2141236  | NC         |
| IS5A      | M91-38   | +      | 2149176  | NC         |
| IS5A      | M101-039 | +      | 2149261  | yegJ       |
| IS5A      | M88-10   | +      | 2189118  | yehC       |
| IS5A      | M133-028 | +      | 2202550  | NC         |
| IS5A      | M101-021 | +      | 2235650  | mglC       |
| IS5A      | M101-003 | -      | 2288500  | NC         |
| IS5A      | M180-32  | +      | 2341640  | yfaL       |
| IS5A      | M2m-53   | +      | 2362408  | NC         |
| IS5A      | M2m-09   | +      | 2362409  | NC         |
| IS5A      | M22-58   | -      | 2381846  | elaD       |
| IS5A      | M2m-95   | -      | 2384003  | yfbL       |
| IS5A      | M94-34   | +      | 2385898  | yfbN       |
| IS5A      | M35-090  | +      | 2404361  | lrhA       |
| IS5A      | M133-003 | -      | 2406416  | alaA       |
| IS5A      | M40-28   | +      | 2452816  | NC         |
| IS5A      | M2m-33   | +      | 2463291  | NC         |
| IS5A      | M2m-32   | +      | 2463292  | NC         |

Continued on next page

S8 Table – continued from previous page

| IS Family | Line     | Strand | Position | Gene name* |
|-----------|----------|--------|----------|------------|
| IS5A      | M40-21   | -      | 2468726  | NC         |
| IS5A      | wt-38    | -      | 2472006  | NC         |
| IS5A      | M101-063 | -      | 2474561  | NC         |
| IS5A      | M88-08   | +      | 2475749  | NC         |
| IS5A      | wt-63    | +      | 2488204  | yfdV       |
| IS5A      | M2m-12   | -      | 2492733  | ypdI       |
| IS5A      | M40-43   | +      | 2574058  | NC         |
| IS5A      | M91-45   | -      | 2574112  | NC         |
| IS5A      | M133-095 | +      | 2755508  | NC         |
| IS5A      | mutL75   | -      | 2755532  | NC         |
| IS5A      | M40-72   | +      | 2759036  | yfjJ       |
| IS5A      | M101-067 | -      | 2759254  | NC         |
| IS5A      | M40-68   | -      | 2759369  | NC         |
| IS5A      | M35-009  | +      | 2772577  | yfjW       |
| IS5A      | M40-35   | -      | 2772968  | yfjW       |
| IS5A      | wt-14    | -      | 2782939  | NC         |
| IS5A      | M133-113 | -      | 2785309  | NC         |
| IS5A      | M133-050 | -      | 2786476  | NC         |
| IS5A      | mutL2    | -      | 2786633  | NC         |
| IS5A      | M133-061 | -      | 2786785  | NC         |
| IS5A      | M91-37   | +      | 2786815  | NC         |
| IS5A      | M133-067 | -      | 2796704  | NC         |
| IS5A      | M91-31   | +      | 2796704  | NC         |
| IS5A      | M91-70   | +      | 2797405  | alaE       |
| IS5A      | M88-62   | +      | 2883864  | ygcB       |
| IS5A      | M61-25   | -      | 2900262  | ygcE       |
| IS5A      | M180-15  | +      | 2908300  | mazG       |
| IS5A      | M101-109 | -      | 2919375  | gudP       |
| IS5A      | M133-083 | -      | 2932246  | NC         |
| IS5A      | M88-16   | +      | 2986475  | NC         |
| IS5A      | M180-09  | -      | 2986993  | yqeI       |
| IS5A      | M133-054 | -      | 2989978  | NC         |
| IS5A      | M101-085 | +      | 2994208  | NC         |
| IS5A      | M40-61   | -      | 2997119  | NC         |
| IS5A      | M101-015 | -      | 3003180  | ygeV       |
| IS5A      | M101-085 | +      | 3009433  | hyuA       |
| IS5A      | M133-095 | +      | 3029943  | ygfU       |
| IS5A      | M35-076  | +      | 3066848  | NC         |
| IS5A      | M88-10   | +      | 3117210  | NC         |
| IS5A      | M94-54   | +      | 3119418  | NC         |
| IS5A      | M35-019  | +      | 3129628  | yghQ       |
| IS5A      | M88-08   | +      | 3130221  | yghQ       |
| IS5A      | M91-70   | +      | 3134182  | pitB       |
| IS5A      | M40-11   | +      | 3134959  | gss        |
| IS5A      | M91-52   | +      | 3184174  | NC         |
| IS5A      | M133-001 | -      | 3184180  | NC         |
| IS5A      | M2m-84   | -      | 3189724  | NC         |
| IS5A      | M40-15   | -      | 3255712  | yhaO       |
| IS5A      | M40-40   | +      | 3260643  | tdcD       |
| IS5A      | M91-05   | +      | 3264992  | tdcA       |

Continued on next page

S8 Table – continued from previous page

| IS Family | Line     | Strand | Position | Gene name* |
|-----------|----------|--------|----------|------------|
| IS5A      | wt-45    | -      | 3265171  | NC         |
| IS5A      | M133-018 | -      | 3265939  | yhaB       |
| IS5A      | M180-01  | -      | 3266281  | yhaB       |
| IS5A      | M133-111 | +      | 3267034  | yhaC       |
| IS5A      | wt-65    | +      | 3267456  | yhaC       |
| IS5A      | wt-49    | -      | 3271028  | garL       |
| IS5A      | M91-38   | -      | 3284384  | agaI       |
| IS5A      | M40-16   | -      | 3285202  | NC         |
| IS5A      | M6-21    | +      | 3285672  | yraH       |
| IS5A      | M133-001 | -      | 3286477  | yraI       |
| IS5A      | M101-093 | +      | 3338118  | NC         |
| IS5A      | M101-021 | +      | 3359472  | gltF       |
| IS5A      | M91-28   | +      | 3363109  | yhcD       |
| IS5A      | M2m-41   | +      | 3363358  | NC         |
| IS5A      | M35-016  | +      | 3365087  | yhcF       |
| IS5A      | M2m-44   | +      | 3365319  | yhcF       |
| IS5A      | M180-88  | +      | 3365384  | yhcF       |
| IS5A      | M133-115 | +      | 3365390  | yhcF       |
| IS5A      | M180-79  | +      | 3366688  | yhcG       |
| IS5A      | M40-36   | -      | 3436010  | NC         |
| IS5A      | M101-015 | -      | 3453860  | gspC       |
| IS5A      | M40-64   | +      | 3453860  | gspC       |
| IS5A      | M91-45   | -      | 3580635  | yhhZ       |
| IS5A      | M40-32   | +      | 3580871  | yhhZ       |
| IS5A      | wt-50    | -      | 3580871  | yhhZ       |
| IS5A      | M91-02   | +      | 3582414  | NC         |
| IS5A      | M91-31   | +      | 3592682  | livM       |
| IS5A      | M22-78   | +      | 3629165  | yhiJ       |
| IS5A      | M2m-24   | -      | 3629165  | yhiJ       |
| IS5A      | M133-020 | +      | 3630523  | yhiJ       |
| IS5A      | M88-18   | -      | 3631479  | NC         |
| IS5A      | M91-05   | -      | 3632765  | NC         |
| IS5A      | M101-013 | -      | 3633524  | yhiM       |
| IS5A      | M91-15   | -      | 3643233  | NC         |
| IS5A      | M180-34  | +      | 3648715  | NC         |
| IS5A      | M40-11   | +      | 3648917  | NC         |
| IS5A      | M101-033 | +      | 3648975  | NC         |
| IS5A      | M133-063 | +      | 3649603  | NC         |
| IS5A      | M101-017 | +      | 3649604  | NC         |
| IS5A      | M101-085 | +      | 3653517  | yhiD       |
| IS5A      | M101-007 | -      | 3654749  | hdeA       |
| IS5A      | M40-42   | +      | 3655738  | NC         |
| IS5A      | M101-035 | -      | 3656996  | NC         |
| IS5A      | M88-39   | +      | 3657006  | NC         |
| IS5A      | M2m-09   | -      | 3663310  | gadX       |
| IS5A      | M101-063 | +      | 3694400  | NC         |
| IS5A      | M133-095 | -      | 3694450  | NC         |
| IS5A      | @M40-25  | +      | 3718699  | NC         |
| IS5A      | M88-50   | +      | 3720188  | NC         |
| IS5A      | M101-043 | -      | 3729482  | xyIF       |

Continued on next page

S8 Table – continued from previous page

| IS Family | Line     | Strand | Position | Gene name* |
|-----------|----------|--------|----------|------------|
| IS5A      | M101-069 | +      | 3749886  | yiaT       |
| IS5A      | M133-070 | +      | 3764113  | rhsA       |
| IS5A      | M133-014 | -      | 3764135  | rhsA       |
| IS5A      | M35-051  | +      | 3766621  | yibG       |
| IS5A      | M40-59   | -      | 3767589  | NC         |
| IS5A      | M40-61   | +      | 3767865  | NC         |
| IS5A      | M133-070 | +      | 3770959  | mtlA       |
| IS5A      | M88-49   | +      | 3791868  | NC         |
| IS5A      | M101-079 | -      | 3794975  | rfaL       |
| IS5A      | M101-019 | -      | 3795602  | rfaL       |
| IS5A      | M133-092 | +      | 3798207  | rfaZ       |
| IS5A      | M101-063 | +      | 3803148  | NC         |
| IS5A      | M101-027 | +      | 3857981  | yidK       |
| IS5A      | wt-61    | +      | 3874242  | yidA       |
| IS5A      | wt-35    | +      | 3888579  | tnaB       |
| IS5A      | M88-75   | +      | 3896707  | yieK       |
| IS5A      | M35-078  | -      | 3900193  | bglH       |
| IS5A      | M101-013 | -      | 3900194  | bglH       |
| IS5A      | wt-17    | +      | 3904192  | bglG       |
| IS5A      | M91-28   | +      | 3920528  | NC         |
| IS5A      | wt-49    | -      | 4044727  | NC         |
| IS5A      | M101-037 | -      | 4067274  | yihQ       |
| IS5A      | M91-38   | +      | 4087204  | frvR       |
| IS5A      | M133-075 | -      | 4240343  | NC         |
| IS5A      | M91-27   | -      | 4248742  | NC         |
| IS5A      | M133-014 | +      | 4248800  | NC         |
| IS5A      | M133-056 | -      | 4266663  | NC         |
| IS5A      | M101-109 | +      | 4302152  | yticA      |
| IS5A      | M40-21   | +      | 4304754  | NC         |
| IS5A      | wt-14    | +      | 4304905  | alsK       |
| IS5A      | wt-45    | +      | 4304905  | alsK       |
| IS5A      | M88-32   | +      | 4335857  | adiY       |
| IS5A      | wt-14    | -      | 4347082  | NC         |
| IS5A      | M88-09   | +      | 4351279  | lysU       |
| IS5A      | M40-47   | -      | 4352849  | NC         |
| IS5A      | M40-36   | -      | 4358816  | cadC       |
| IS5A      | M40-56   | -      | 4425276  | yjfZ       |
| IS5A      | M133-069 | -      | 4440285  | NC         |
| IS5A      | M133-056 | -      | 4474824  | yjgL       |
| IS5A      | M101-087 | +      | 4478867  | yjgN       |
| IS5A      | M91-01   | +      | 4489801  | idnT       |
| IS5A      | M6-27    | -      | 4492643  | NC         |
| IS5A      | wt-49    | -      | 4495943  | NC         |
| IS5A      | M101-015 | +      | 4501717  | NC         |
| IS5A      | M133-020 | -      | 4501717  | NC         |
| IS5A      | M133-028 | -      | 4503748  | yjhC       |
| IS5A      | M40-39   | -      | 4503748  | yjhC       |
| IS5A      | M91-29   | -      | 4538455  | NC         |
| IS5A      | M6-20    | +      | 4538934  | NC         |
| IS5A      | M88-67   | +      | 4543809  | fimD       |

Continued on next page

**S8 Table – continued from previous page**

| <b>IS Family</b> | <b>Line</b> | <b>Strand</b> | <b>Position</b> | <b>Gene name*</b> |
|------------------|-------------|---------------|-----------------|-------------------|
| IS5A             | M88-63      | +             | 4554026         | yjiC              |
| IS5A             | M133-050    | -             | 4554779         | NC                |
| IS5A             | M2m-12      | +             | 4574998         | mcrC              |
| IS5A             | M40-23      | -             | 4577383         | NC                |
| IS5A             | M88-37      | -             | 4577383         | NC                |
| IS5A             | M94-33      | -             | 4578791         | hsdS              |
| IS5A             | M133-105    | +             | 4589349         | NC                |
| IS5A             | M88-20      | +             | 4589349         | NC                |
| IS5B             | wt-50       | -             | 1753780         | pykF              |
| IS5B             | M133-075    | -             | 2931030         | fucO              |
